# Supplementary material for: An Autophagy Modifier Screen Identifies Small Molecules Capable of Reducing Autophagosome Accumulation in a Model of CLN3-Mediated Neurodegeneration
Source: MDPI journal article supplement (doi:10.3390/cells8121531), 2019-11-27
Supplement: s1 [file s1]

Figure S1.

Analysis of relative activity of 261 compounds common between the libraries used in the current screen and the Chandrachud et al., JBC 2015 screen

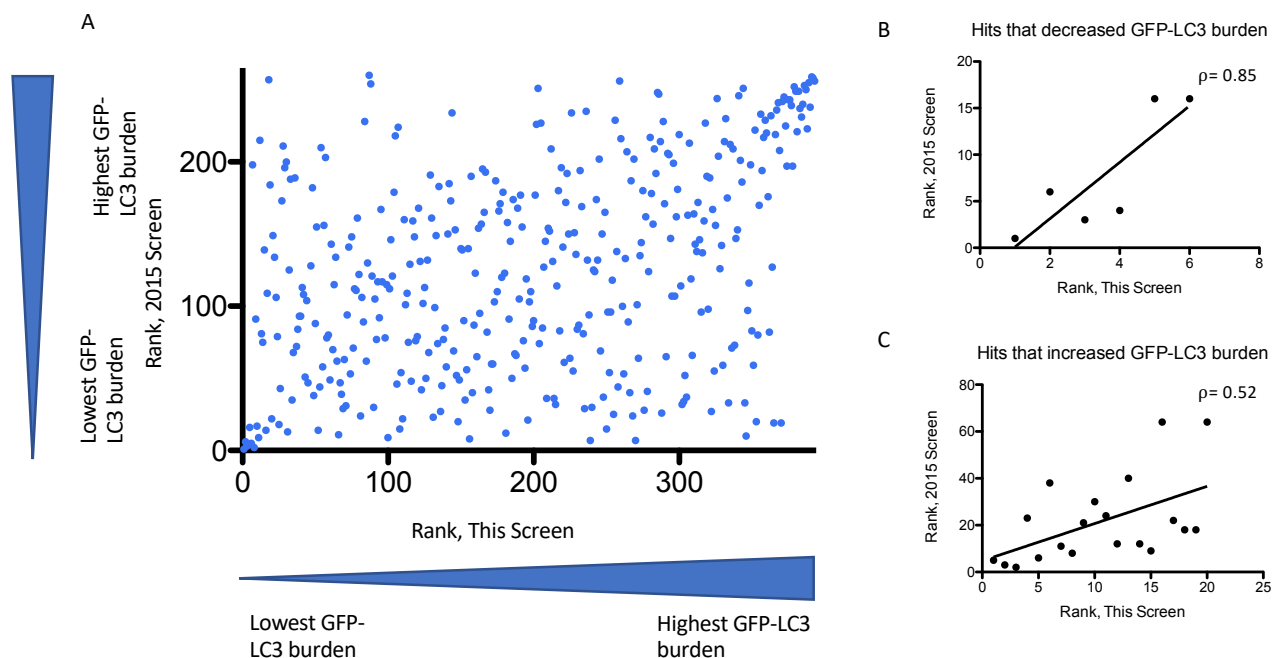

**Figure S1. Relative activity comparison for 261 compounds that were common in the current screen and in a smaller-scale screen reported in 2015.** A rank list of relative activity (from z-scores, representing the lowest to highest GFP-LC3 burden) was prepared for the compounds in common for each of the screens. Assay readouts from the two different screens were % GFP-LC3-positive cells (this screen) or mean vesicle count per cell (2015 screen. Chandrachud et al., J Biol Chem, 2015), which were then converted to z-scores (see Methods and Chandrachud et al., J Biol Chem, 2015). A) An XY scatter plot for rank values of all compounds is shown (this screen, x-axis; 2015 screen, y-axis). B) A scatter plot is shown for only the hit compounds that decreased GFP-LC3 burden that were identified in the current screen, but which had also been present in the 2015 screen. The Pearson's correlation ( $\rho$ ) was determined ( $= 0.85$ ), which was significant in a two-tailed analysis ( $P < 0.05$ ). C) A reverse rank list was generated for better visualization of correlation among the hits that increased the GFP-LC3 burden, and the scatter plot in C shows this reverse ranks for only the hit compounds identified in the current screen, but which had also been present in the 2015 screen. The Pearson's correlation ( $\rho$ ) was determined ( $= 0.52$ ), which was significant in a two-tailed analysis ( $P < 0.05$ ).

Chandrachud, U.; Walker, M.W.; Simas, A.M.; Heetveld, S.; Petcherski, A.; Klein, M.; Oh, H.; Wolf, P.; Zhao, W.N.; Norton, S., et al. Unbiased Cell-based Screening in a Neuronal Cell Model of Batten Disease Highlights an Interaction between  $\text{Ca}^{2+}$  Homeostasis, Autophagy, and CLN3 Protein Function. *J Biol Chem* **2015**, *290*, 14361-14380, doi:10.1074/jbc.M114.621706.

Figure S2.

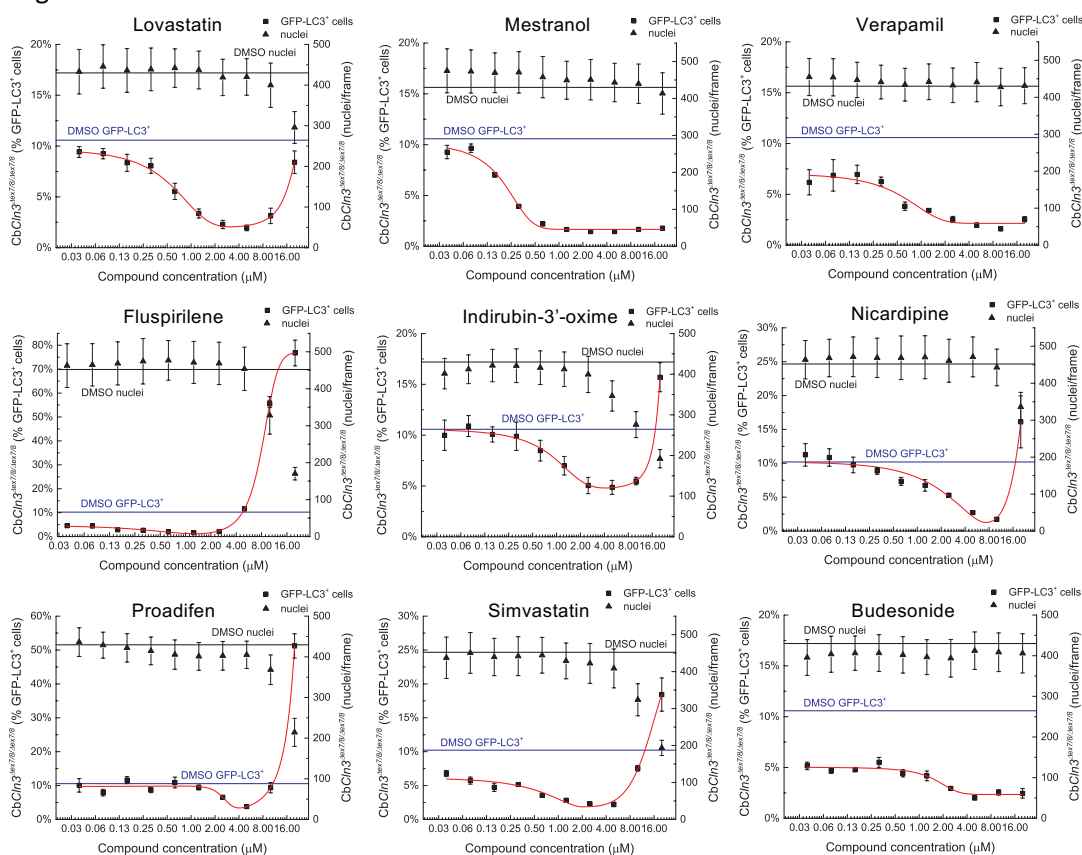

**Figure S2. Dose-response of selected hit compounds.** Graphs of dose-response effect on percentage of GFP-LC3-positive cells (squares; left y-axis) and on nuclei count (triangles; right y-axis) in *CbCln3<sup>Δex7/8Δex7/8</sup>* cells are shown for all of the compounds that were selected for validation in dose-response experiments. Compound concentrations (μM) are shown on the x-axis. For reference, the mean values for percentage of GFP-LC3-positive cells and nuclei count for DMSO-treated wells are indicated by the solid lines (blue line= DMSO % GFP-LC3<sup>+</sup> cells; black line= DMSO nuclei count). Error bars represent standard deviation from the mean, determined from three separate experiments (n=4 replicates in each experiment).

Figure S3.

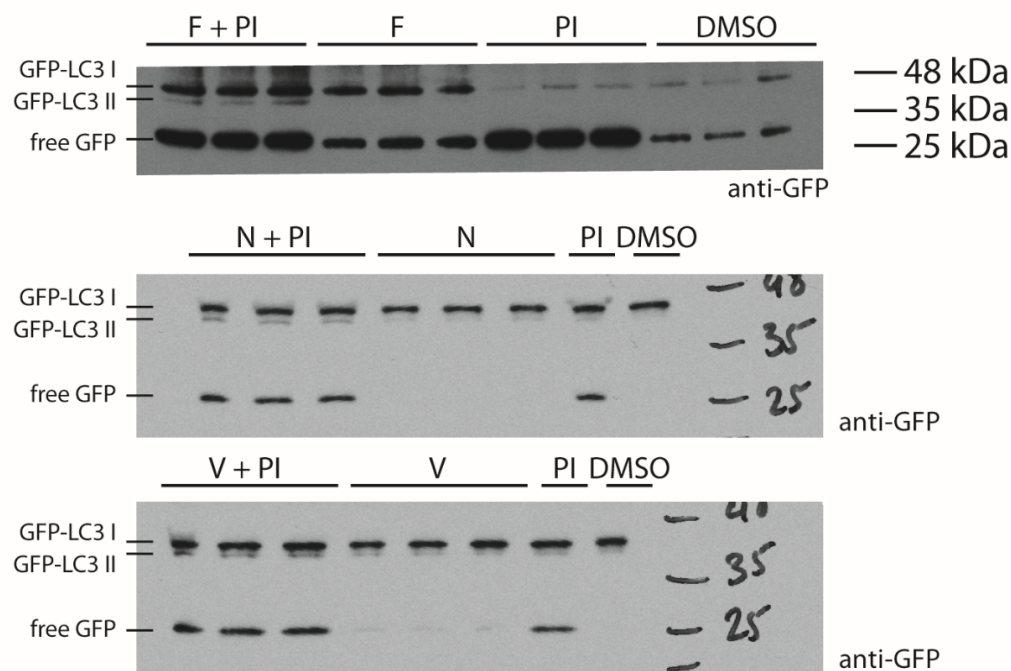

**Figure S3. Anti-GFP immunoblots to monitor autophagic flux.** Immunoblots showing triplicate lysates from stable expressing GFP-LC3 *CbCln3 $\Delta$ ex7/8/ $\Delta$ ex7/8* cells treated for 24h with Fluspirilene (F), Nicardipine (N) and Verapamil (V) (10  $\mu$ M), either alone or in combination with protease inhibitor (PI) (see Methods for full experimental details). Lysates from PI and DMSO treated cells were used as controls. Molecular weights are indicated on the right (kDa= kilodalton). The different isoforms of the transgene GFP-LC3 (GFP-LC3I, GFP-LC3II, and free GFP) are indicated to the left of the blots.

Figure S4.

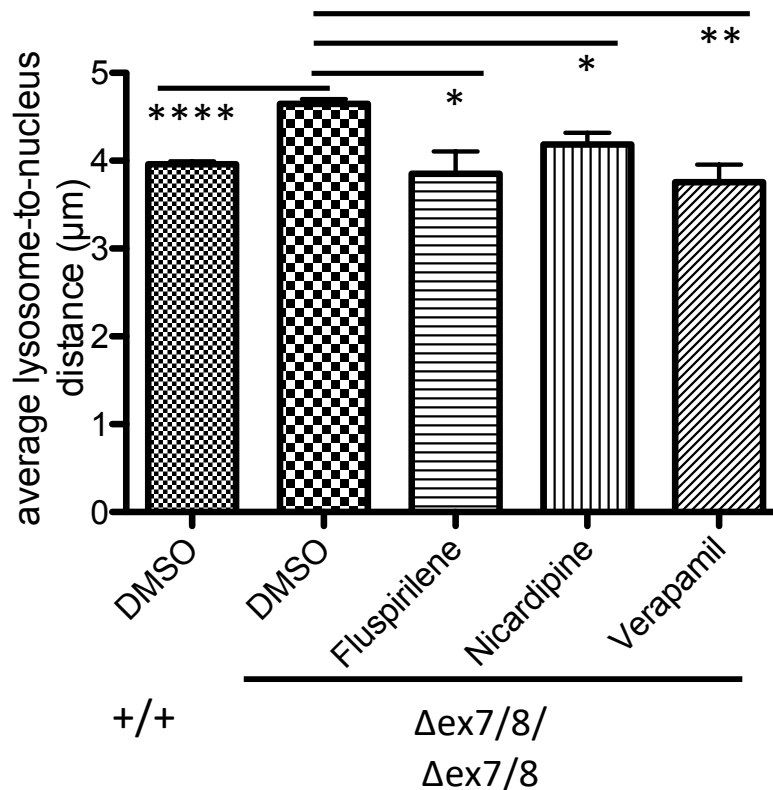

**Figure S4. Average lysosome-to-nucleus measurements from primary screen.** Bar graph shows the average lysosome-to-nucleus distance determined in the secondary readout from the primary screen, for  $CbCln3^{+/+}$  (" $+/+$ ") DMSO-treated cells versus  $CbCln3^{\Delta ex7/8/\Delta ex7/8}$  cells (" $\Delta ex7/8/\Delta ex7/8$ "), treated either with DMSO or with the indicated compounds. Welch's t-test was used to determine statistical significance due to unequal sample size/variance in the DMSO-treated versus the compound-treated datasets. \*\*\*\*,  $P < 0.0001$ ; \*\*,  $P < 0.01$ ; \*,  $P < 0.05$

Figure S5.

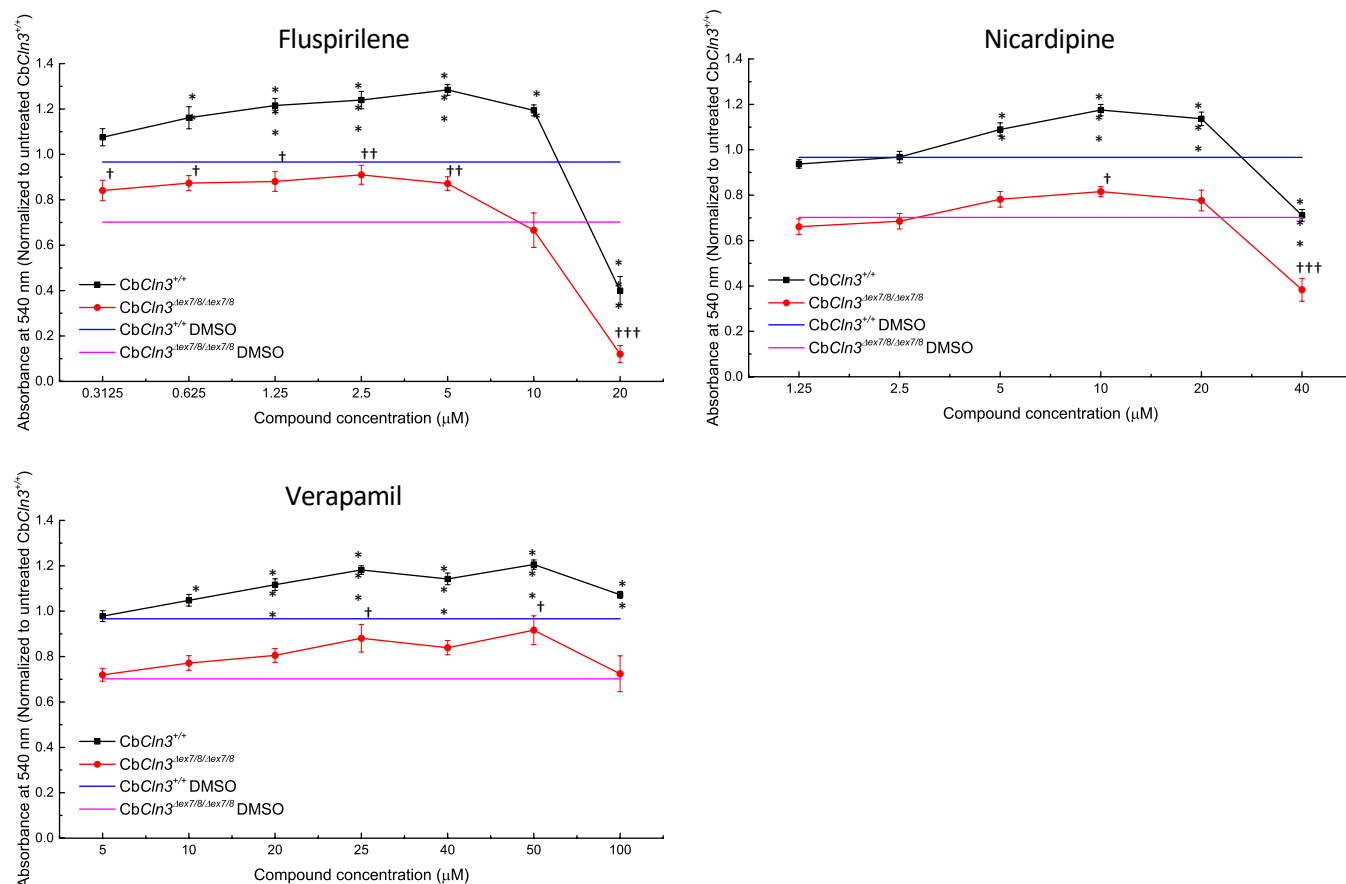

**Figure S5. MTT assay toxicity analysis for fluspirilene, nicardipine, and verapamil.** Graphs show relative toxicity as determined by MTT assay over the dose ranges indicated on the x-axis (compound treated *CbCln3*<sup>+/+</sup> cell values are shown in black, compound treated *CbCln3*<sup>Δex7/8/Δex7/8</sup> cell values are shown in red). Data were normalized to the untreated wild-type (*CbCln3*<sup>+/+</sup>) cell values. Mean DMSO treated values are shown by the blue line (*CbCln3*<sup>+/+</sup> cells) and the pink line (*CbCln3*<sup>Δex7/8/Δex7/8</sup> cells). Data represent mean ± SEM of n=3 experiments. \*, P < 0.05; \*\*, P < 0.01; \*\*\*, P < 0.001 of DMSO control *CbCln3*<sup>+/+</sup> cells tested against treated *CbCln3*<sup>+/+</sup> cells and †, P < 0.05; ††, P < 0.01; †††, P < 0.001 of DMSO control *CbCln3*<sup>Δex7/8/Δex7/8</sup> cells tested against treated *CbCln3*<sup>Δex7/8/Δex7/8</sup> cells (one-way ANOVA with Fisher post-hoc test).
